# Supplementary material
Source: PubMed Central journal article supplement (PMC4109137)

## Supplementary data

**Figure S1.** A typical LC-MS/MS chromatogram depicting separation of (A) xanthosine-5'monophosphate, XMP and intracellular adenosine monophosphate, AMP (B) XMP and (C) intracellular AMP.

Figure 4

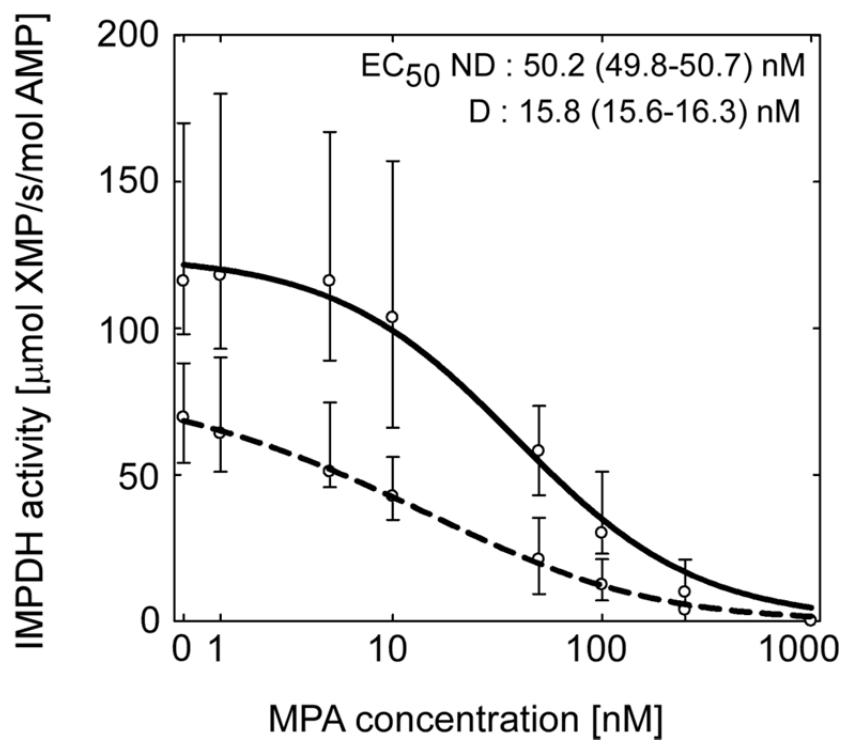

Figure S1

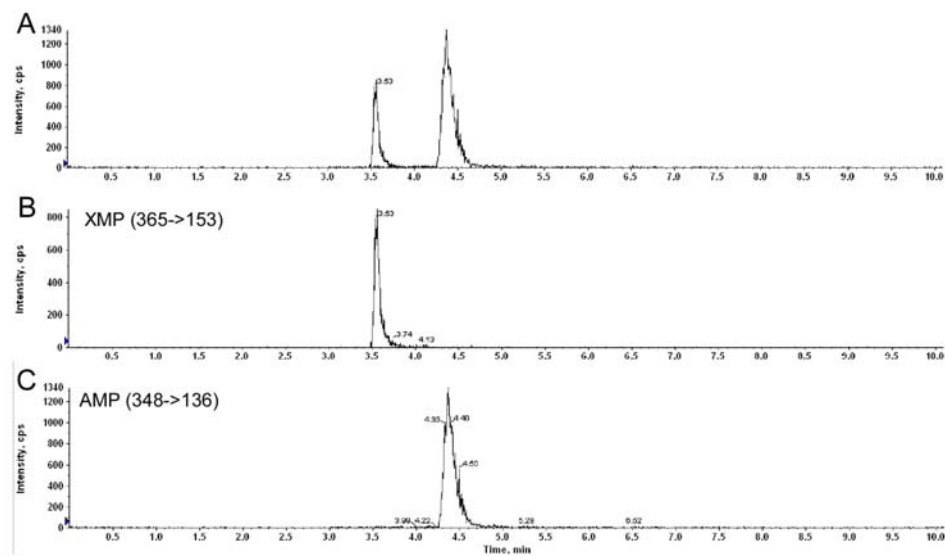

Supplement: NIHMS596733-supplement-supplement_1.pdf [file NIHMS596733-supplement-supplement_1.pdf]
